# Supplementary material for: Unique antimicrobial activity in honey from the Australian honeypot ant (Camponotus inflatus)
Source: PeerJ. 2023 Jul 26;11:e15645. doi: 10.7717/peerj.15645 (PMC10386826; doi:10.7717/peerj.15645)
Supplement: Supplemental Information 1 — The raw data for antimicrobial testing, honey chemistry, phenolics and antioxidants. [file peerj-11-15645-s001.xlsx]

## Sheet: MICs
Ref.	Name		BACTERIA MICS
			Staphylococcus aureus				Enterococcus faecalis				Pseudomonas aeruginosa				Escherichia coli				Staphylococcus aureus				Enterococcus faecalis				Pseudomonas aeruginosa				Escherichia coli
			Total Activity				Total Activity				Total Activity				Total Activity				Non-Peroxide Activity				Non-Peroxide Activity				Non-Peroxide Activity				Non-Peroxide Activity
			R1	R2	Mode		R1	R2	Mode		R1	R2	Mode		R1	R2	Mode		R1	R2	Mode		R1	R2	Mode		R1	R2	Mode		R1	R2	Mode
MIC100	Honeypot 100% Inhibition		8	8	8		>32	>32	>32		>32	>32	>32		>32	>32	>32		32	32	32
MIC80	Honeypot 80% Inhibition		8	8	8		32	32	32		>32	>32	>32		32	32	32		16	16	16
MIC50	Honeypot 50% Inhibition		8	8	8		32	32	32		32	32	32		32	32	32		16	16	16
ART	Artificial		>32	>32	>32		>32	>32	>32		32	32	32		>32	>32	>32
JAR	Jarrah		16	16	16		16	16	16		16	16	16		16	16	16
MAN	Manuka		8	8	8		16	16	16		16	16	16		16	16	16
Ref.	Name		YEAST MICS
			Candida albicans				Candida glabrata				Cryptococcus neoformans				Cryptococcus deuterogattii				Candida albicans				Candida glabrata				Cryptococcus neoformans				Cryptococcus deuterogattii
			Total Activity				Total Activity				Total Activity				Total Activity				Non-Peroxide Activity				Non-Peroxide Activity				Non-Peroxide Activity				Non-Peroxide Activity
			R1	R2	Mode		R1	R2	Mode		R1	R2	Mode		R1	R2	Mode		R1	R2	Mode		R1	R2	Mode		R1	R2	Mode		R1	R2	Mode
MIC100	Honeypot 100% Inhibition		>32	>32	>32		>32	>32	>32		16	16	16		32	32	32										32	32	32		32	32	32
MIC80	Honeypot 80% Inhibition		>32	>32	>32		>32	>32	>32		8	8	8		16	16	16										16	16	16		16	16	16
MIC50	Honeypot 50% Inhibition		>32	>32	>32		>32	>32	>32		8	8	8		16	16	16										16	16	16		8	8	8
ART	Artificial		>32	>32	>32		>32	>32	>32		>32	>32	>32		>32	>32	>32
JAR	Jarrah		16	16	16		16	16	16		16	16	16		16	16	16
MAN	Manuka		16	16	16		16	16	16		16	16	16		16	16	16
Ref.	Name		MOULD MICS
			Aspergillus fumigatus				Aspergillus flavus				Fusarium oxysporum				Microsporum gypseum				Aspergillus fumigatus				Aspergillus flavus				Fusarium oxysporum				Microsporum gypseum
			Total Activity				Total Activity				Total Activity				Total Activity				Non-Peroxide Activity				Non-Peroxide Activity				Non-Peroxide Activity				Non-Peroxide Activity
			R1	R2	Mode		R1	R2	Mode		R1	R2	Mode		R1	R2	Mode		R1	R2	Mode		R1	R2	Mode		R1	R2	Mode		R1	R2	Mode
MIC100	Honeypot 100% Inhibition		16	16	16		16	16	16		32	32	32		32	32	32		16	16	16		16	16	16
MIC80	Honeypot 80% Inhibition		16	16	16		16	16	16		32	32	32		32	32	32		16	16	16		16	16	16
MIC50	Honeypot 50% Inhibition		16	16	16		8	8	8		32	32	32		32	32	32		16	16	16		8	8	8
ART	Artificial		>32	>32	>32		>32	>32	>32		>32	>32	>32		>32	>32	>32
JAR	Jarrah		16	16	16		16	16	16		16	16	16		8	8	8
MAN	Manuka		16	16	16		16	16	16		8	8	8		8	8	8

## Sheet: Phenol
Ref.	Name		PHENOL EQUIVALENCE
			Staphylococcus aureus				Enterococcus faecalis
			Total Activity (% PE)				Non-Peroxide Activity (% PE)
			R1	R2	Ave		R1	R2	Ave
HPA	Honeypot Ant		7.71481	8.90404	8.30942		0	0	0
ART	Artificial		0	N/A	0		0	N/A	0
JAR	Jarrah		11.6479	N/A	11.6479		0	N/A	0
MAN	Manuka		19.6868	N/A	19.6868		20.0511	N/A	20.0511

## Sheet: Colour & pH
Ref.	Name		COLOUR										pH
			A450 (1cm)		A720 (1cm)		Colour (mAU)	A635 (1cm)		Pfund Value	Honey Colour		1g in 7.5mL		Ave
			R1	R2	R1	R2		R1	R2				R1	R2
HPA	Honeypot Ant		2.172	2.186	0.331	0.339	1844	0.544	0.554	165.193	Dark Amber		3.49	3.36	3.425
ART	Artificial		0.128	N/A	0.078	N/A	50	0.093	N/A	-4.16073	Water White		4.48	N/A	4.48
JAR	Jarrah		2.196	N/A	0.539	N/A	1657	0.651	N/A	203.075	Dark Amber		4.46	N/A	4.46
MAN	Manuka		2.961	N/A	0.528	N/A	2433	0.771	N/A	247.642	Dark Amber		3.79	N/A	3.79

## Sheet: Moisture & Water Activity
Ref.	Name		MOISTURE & WATER ACTIVITY
			Moisture					Water Activity
			˚Brix	Temp (˚C)	Correction	Moisture %		Aw	Temp (˚C)	Correction	Aw Final
HPA	Honeypot Ant		63.2	23	0.27	36.53		0.802	24.9	-0.005	0.797
ART	Artificial		78.1	24	0.36	21.54		0.582	24.9	-0.005	0.577
JAR	Jarrah		83.1	24.1	0.369	16.531		0.545	24.9	-0.005	0.54
MAN	Manuka		79.4	24.1	0.369	20.231		0.608	24.9	-0.005	0.603

## Sheet: Hydrogen Peroxide
Ref.	Name		HYDROGEN PEROXIDE
			Time (h)									Standards
			0	0.5	1	1.5	2	2.5	3	4		Conc. H2O2	Abs
HPA	Honeypot Ant R1		0.079	0.077	0.08	0.077	0.076	0.077	0.078	0.078		68.75	0.86
HPA	Honeypot Ant R2		0.104	0.108	0.11	0.11	0.104	0.111	0.092	0.088		34.375	0.533
HPA	Honeypot Ant Ave		0.0915	0.0925	0.095	0.0935	0.09	0.094	0.085	0.083		17.1875	0.312
ART	Artificial R1		0.058	0.057	0.056	0.053	0.054	0.052	0.052	0.058		8.59375	0.183
ART	Artificial R2		0.05	0.051	0.051	0.045	0.041	0.051	0.04	0.05		4.29688	0.11
ART	Artificial Ave		0.054	0.054	0.0535	0.049	0.0475	0.0515	0.046	0.054		2.14844	0.072
JAR	Jarrah R1		0.099	0.211	0.248	0.244	0.258	0.223	0.174	0.113		1.07422	0.052
JAR	Jarrah R2		0.113	0.12	0.115	0.107	0.099	0.111	0.08	0.089
JAR	Jarrah Ave		0.106	0.1655	0.1815	0.1755	0.1785	0.167	0.127	0.101
MAN	Manuka R1		0.107	0.111	0.104	0.112	0.106	0.111	0.107	0.109
MAN	Manuka R2		0.117	0.124	0.125	0.134	0.127	0.135	0.111	0.114
MAN	Manuka Ave		0.112	0.1175	0.1145	0.123	0.1165	0.123	0.109	0.1115
Ref.	Name		TRANSFORMED VALUES
			Time (h)
			0	0.5	1	1.5	2	2.5	3	4
HPA	Honeypot Ant		1.85	1.93333	2.14167	2.01667	1.725	2.05833	1.30833	1.14167
ART	Artificial		-1.275	-1.275	-1.31667	-1.69167	-1.81667	-1.48333	-1.94167	-1.275
JAR	Jarrah		3.05833	8.01667	9.35	8.85	9.1	8.14167	4.80833	2.64167
MAN	Manuka		3.55833	4.01667	3.76667	4.475	3.93333	4.475	3.30833	3.51667

## Sheet: Phenolics-FC
Ref.	Name		FC ASSAY
			Abs				Honey Blank	mg GAE/ kg		Standards
			R1	R2	R3	Ave				Gallic Acid (mg/ml) Adjusted	Abs
HPA	Honeypot Ant		0.338	0.326	0.346	0.296667	0.04	436.518		0.018	0.637
ART	Artificial		0.067	0.067	0.07	0.031	0.037	38.3664		0.016	0.541667
JAR	Jarrah		0.357	0.39	0.569	0.384667	0.054	568.403		0.014	0.462333
MAN	Manuka		0.433	0.437	0.438	0.378	0.058	558.411		0.012	0.393
										0.01	0.329
										0.008	0.271
										0.006	0.211
										0.004	0.157333

## Sheet: Phenolics-FBBB
Ref.	Name		FBBB ASSAY
			Abs				Honey Blank	mg GAE/ kg		Standards
			R1	R2	R3	Ave				Gallic Acid (mg/ml) Adjusted	Abs
HPA	Honeypot Ant		0.744	0.812	0.704	0.716333	0.037	159.43		0.015	0.489667
ART	Artificial		0.085	0.082	0.075	0.0806667	0.049	-41.0006		0.0133333	0.462667
JAR	Jarrah		1.103	1.205	1.132	1.14667	0.675	295.118		0.0116667	0.426667
MAN	Manuka		1.562	1.562	1.638	1.58733	1.186	434.064		0.01	0.397333
										0.00833333	0.391333
										0.00666667	0.358333
										0.005	0.299667
										0.00333333	0.255667

## Sheet: Antioxidants-FRAP
Ref.	Name		FRAP ASSAY
			Abs				Honey Blank	µmol Fe2+/kg		Standards
			R1	R2	R3	Ave				FeSO4 (µM) Adjusted	Abs
HPA	Honeypot Ant		1.354	1.349	1.388	1.32367	0.04	3267.91		200	2.47
ART	Artificial		0.706	0.663	0.638	0.632	0.037	-411.17		100	1.831
JAR	Jarrah		1.573	1.522	1.54	1.491	0.054	4157.98		50	1.276
MAN	Manuka		1.608	1.571	1.643	1.54933	0.058	4468.26		25	0.954333
										12.5	0.802
										6.25	0.715
										3.125	0.701
										1.5625	0.707333
										0.78125	0.686667
										0.390625	0.695333

## Sheet: Antioxidants-DPPH
Ref.	Name		DPPH ASSAY
			Abs				Honey Blank	µmol TE/kg		Standards
			R1	R2	R3	Ave				Trolox (µM) Adjusted	Abs
HPA	Honeypot Ant		0.471	0.485	0.544	0.463	0.037	4497.95		33.3333	0.305667
ART	Artificial		0.84	0.743	0.871	0.781	0.037	1245.68		30.5556	0.389
JAR	Jarrah		0.392	0.401	0.567	0.404333	0.049	5097.95		27.7778	0.4
MAN	Manuka		0.386	0.364	0.517	0.367333	0.055	5476.36		25	0.472
										22.2222	0.511667
										19.4444	0.565
										16.6667	0.597667
										13.8889	0.653333
										11.1111	0.708
										8.33333	0.759
										5.55556	0.808
										2.77778	0.855333
